1 **Building Key Populations HIV Cascades` in Data-Scarce Environments: Towards a participatory**  
2 **stakeholder methodology for cascades construction, adoption, and utilization**

3  
4 **Tim Lane<sup>1,2\*</sup>, Mike Grasso<sup>1</sup>, Andrew Scheibe<sup>3</sup>, Grace Liu<sup>1,4</sup>, Alexander Marr<sup>1</sup>, Pelagia**  
5 **Murangandi<sup>5</sup>, Getahun Aynalem<sup>5</sup>, Mariette Slabbert<sup>6</sup>, Lebowa Malaka<sup>7</sup>, Zachary Isdahl<sup>1</sup>,**  
6 **Thomas Osmand<sup>1</sup>, Patrick Nadol<sup>5</sup>**

7  
8 <sup>1</sup>Institute for Global Health Sciences, University of California San Francisco, San Francisco, CA

9  
10 <sup>2</sup>Equal International, Horsham, UK

11  
12 <sup>3</sup>Independent Consultant, Cape Town, South Africa

13  
14 <sup>4</sup>Columbia University, New York, NY

15  
16 <sup>5</sup>US Centers for Disease Control and Prevention, Pretoria, South Africa

17  
18 <sup>6</sup>Wits Reproductive Health & HIV Institute, Faculty of Health Sciences, University of Witwatersrand,  
19 South Africa

20  
21 <sup>7</sup>South African National AIDS Council, Pretoria, South Africa

22  
23 **\*Corresponding Author**

24 **Email: [t.e.lane@me.com](mailto:t.e.lane@me.com)**

25

## 26 Introduction

27           Recent HIV key populations (KP) surveillance studies in South Africa, including female sex  
28 workers (FSW) and men who have sex with men (MSM), demonstrate the disproportionate burden of  
29 HIV they bear compared to the general population. The national response for KP has lagged due to  
30 relatively scarce KP data focused narrowly on urban areas. We adopted a participatory data triangulation  
31 approach with stakeholders to overcome the challenges of KP program planning in KP data-scarce  
32 districts. Here we describe our methodology for achieving consensus on population size estimates (PSE)  
33 and treatment cascade indicator estimates derived from FSW and MSM surveillance data and applied  
34 across the country.

## 35 Methods

36           The South African National AIDS Council (SANAC) convened the group; technical advisors  
37 from the University of California San Francisco (UCSF) facilitated; and stakeholders from government,  
38 non-government, academic, and KP-led advocacy organizations involved in program implementation and  
39 research provided input through three in-person meetings covering four phases of work: surveillance data  
40 analysis; cascades data extraction; presentation for feedback; and data extrapolation.

## 41 Results

42           Technical advisors presented eight cascades (three FSW, five MSM) to stakeholders,  
43 recommending data-informed extrapolation factors for each population. Stakeholders adopted  
44 recommendations by consensus with few adjustments. FSW cascades displayed high awareness of HIV  
45 status and steep breakpoints towards ART uptake; MSM cascades displayed less HIV status awareness,  
46 but relatively good ART uptake, with metropolitan areas displaying better uptake than rural districts.

## 47 Conclusion

48           The participatory process enabled KP stakeholders to vet disparate data sources against  
49 programmatic experience and recommend consistency in cascades data; participatory triangulation of  
50 additional surveillance and program data will follow. The considerable time and resource investments in  
51 this process had downstream benefits, including consistency in sub-national HIV implementation plans.  
52 We recommend this consensus-based approach as a transparent, consistent, and sound methodology for  
53 cascades construction in KP data-scarce environments.

54

## 55 Introduction

56 Key populations (KP), including female sex workers (FSW), men who have sex with men  
57 (MSM), people who inject drugs (PWID), and transgender women are marginalized, stigmatized, and  
58 often criminalized throughout Sub-Saharan Africa, and bear a disproportionate burden of HIV(1-4).  
59 Despite its relatively enabling human rights-based policy environment, South Africa is no exception to  
60 regional trends. Its 1996 constitution decriminalized homosexuality, but MSM and other sexual minority  
61 populations remain highly stigmatized; sex work and the use of drugs remains illegal(5). Recent KP HIV  
62 surveillance studies in South Africa have demonstrated consistently high HIV prevalence among KP  
63 groups—for example, among the country’s estimated 150 000 sex workers(6) prevalence estimates range  
64 from 40-88%(7, 8); as many as a third of the country’s 1.2 million MSM(9) are HIV-infected(10); among  
65 the estimated 67,000 PWID(11), HIV prevalence ranges from 14-16.2%(5, 8). And, despite significant  
66 progress in increasing access to anti-retroviral therapy (ART) across most population groups, including  
67 the adoption of Universal Test and Treat (UTT) guidelines (12, 13) in 2016, available evidence suggests  
68 significant barriers to treatment that less than one-third of HIV-positive FSW and less than one-quarter of  
69 HIV-positive MSM were taking ART in 2013 (14, 15).

70 South Africa’s relatively enabling policy environment for KP is characterized by meaningful  
71 FSW and MSM advocacy within civil society and national HIV planning structures(12, 13): meaningful  
72 engagement with organizations representing PWID and transgender women has been more limited. South  
73 African civil society organizations are represented on the South African National AIDS Council  
74 (SANAC); constituent KP “sectors” have guided sponsors including U.S. President’s Emergency Plan for  
75 AIDS Relief (PEPFAR), the Global Fund to Fight AIDS, TB and Malaria, and other funding agencies, to  
76 progressively increase investment in KP-focused programs. To date most programs have had limited,  
77 generally metropolitan geographic reach, focused on primary prevention strategies and HIV testing  
78 services (HTS) promotion. The current National Strategic Plan for HIV, TB and STI’s 2017-2022 has  
79 explicitly called for scale-up of comprehensive prevention and treatment programming for KP to smaller  
80 urban centers and other areas of identified need (16, 17). Programmatic guidelines for FSW and MSM are  
81 laid out in the South African National Sex Worker HIV Plan, 2016-2019(12) and the South African  
82 National LGBTI HIV Plan, 2017-2022(13), respectively. These were developed against the backdrop of  
83 the 2014 UNAIDS 90-90-90 targets, i.e. 90% of all people living with HIV (PLHIV) know their HIV  
84 status, 90% of these on ART (81% of PLHIV), and 90% of these (73% of PLHIV) be virally  
85 suppressed(18-20) by 2020. Achieving 90-90-90 targets for South Africa’s KP requires a data-driven  
86 approach, prioritizing evidence-based interventions to ensure that KP flow efficiently, consistently, and  
87 sustainably through the continua of HIV prevention and treatment services. Thus there is increased need  
88 to build and utilize data systems that effectively monitor the care continuum, or cascade, for KP (21).

89 Cascade analyses provide a framework for assessing and improving service delivery at each stage  
90 of HIV care. They are also a logical modeling tool to identify gaps (referred to as “breakpoints” or “drop-  
91 offs”) and opportunities for KP-specific interventions in the continuum of HIV, allowing program  
92 implementers at facility, regional or national levels to target resources and interventions more effectively,  
93 ultimately improving PLHIV engagement in care, viral suppression, and prevention of onward  
94 transmission.(22) Yet, the same structural factors that contribute to the inequitable burden of HIV among  
95 KP and sub-optimal retention in HIV treatment services (17, 23, 24), also contribute to the scarcity of KP-

96 specific strategic information, and the concentration of what exists in metropolitan health services  
97 environments. Until a wider range of sub-national data exists, a transparent, consistent, and  
98 methodologically sound approach to triangulating existing data to diverse sub-national urban, peri-urban,  
99 and rural environments is critical for proportional HIV program planning(25).

100 Here, we describe our experience of utilizing data from eight South African KP surveillance sites  
101 (three FSW and five MSM) to construct treatment cascades for all 52 sub-national districts for these two  
102 populations. We present indicators for surveillance sites as cascades, and describe the methods and results  
103 of the stakeholder consensus process we believe generated the best possible data for programmatic  
104 planning at this time. We conclude with brief recommendations for roles and responsibilities of  
105 conveners, technical advisors, and stakeholders to aid national-level KP HIV programs confronting the  
106 need for evidence-based service delivery targets in data-scarce environments.

## 107 108 **Methods:**

109 We adapted a method described by WHO for cascade analysis as a group consensus activity  
110 involving multiple stakeholders and disparate sources of data. In our case, we relied primarily on IBBS  
111 data and stakeholder opinion and experience to arrive at consensus cascades.(26) Our national KP  
112 stakeholder consensus process was convened by SANAC; facilitated by technical advisors (TAs) from the  
113 University of California San Francisco (UCSF); and stakeholders representing government, non-  
114 government, academic, and KP-led advocacy organizations involved in program implementation and  
115 research. The work proceeded in four phases. In Phase 1, TAs calculated population size estimates (PSE)  
116 for each population, triangulated from multiple PSE methods embedded in integrated bio-behavioral  
117 surveillance (IBBS) surveys(27). In Phase 2, the technical advisors used IBBS-derived indicator estimates  
118 and PSEs to construct treatment cascades. In Phase 3, investigators presented the methods and results of  
119 Phases 1 and 2 to a group of national KP service providers and stakeholders convened by SANAC;  
120 facilitated stakeholder discussion on the assumptions, methods, results, and limitations of IBBS data;  
121 sought consensus either to adopt estimates as presented, or revise assumptions and calculations for  
122 surveillance data-derived cascades for each population and site; and sought consensus on a set of  
123 “reasonable” assumptions and factors for PSEs and treatment cascade indicators to apply uniformly  
124 throughout the country. In Phase 4, TAs constructed a final set of cascades for the country’s 52 districts,  
125 populated according to the consensus outcomes of Phase 3, and presented as a report to SANAC and the  
126 National Department of Health (NDOH). Below we reference relevant sampling, survey, laboratory, and  
127 PSE methods that informed Phases 1 and 2, and relevant consensus processes that informed Phases 3 and  
128 4.

### 129 130 *Phase 1: IBBS survey and PSE analysis*

131 IBBS data sources were the South Africa Health Monitoring Survey for Female Sex Workers  
132 (SAHMS-FSW), fielded at 3 metropolitan district sites (Johannesburg, Cape Town, and  
133 eThekweni/Durban) in 2013-14, and the South Africa Men’s Health Monitoring Survey (SAMHMS) for  
134 MSM, fielded at 3 metropolitan (Johannesburg, Cape Town, Mangaung/Bloemfontein) and 2 district  
135 municipality (DM) sites (Capricorn DM/Polokwane, Limpopo provincial capital; and NM Molema  
136 DM/Mahikeng, NorthWest provincial capital) in 2015-16. In each survey, we followed standard second-  
137 generation surveillance guidelines for IBBS, including respondent-driven sampling (RDS) survey

138 methodology, that have been described elsewhere(15). Indicator definitions are summarized in Figure 1.  
139 Below, we briefly review each IBBS’s laboratory and statistical analysis methods, and describe methods  
140 for calculating preliminary population size estimates from IBBS data.

141

## 142 **Figure 1. South Africa Key Populations Treatment Cascade Indicator Definitions**

143 *Laboratory analysis.* We assessed HIV-status by laboratory analysis in both populations.

144 Laboratory methods for SAHMS-FSW are described elsewhere.(7) Briefly, BARC laboratories  
145 (Johannesburg) performed testing on serum using an HIV ELISA 4th generation; with confirmation of  
146 discordant results using a third-generation HIV ELISA assay. HIV-1 and HIV-2 Western blot (Bio-Rad  
147 Laboratories, USA) were run on samples when required for definitive diagnosis.

148 For MSM, dried blood spot (DBS) cards (Whatman 903 Protein Saver Cards; Sigma-Aldrich, St  
149 Louis, MO) were assayed at the National Institute for Communicable Diseases (Johannesburg), screened  
150 with a 3rd generation HIV ELISA (Genscreen HIV-1/2 Version 2, Bio-Rad, Marnes-la-Coquette, France).  
151 Non-reactive tests were interpreted negative; reactivities were confirmed positive by a 4th Generation  
152 ELISA, (Vironostika, HIV Ag/Ab Assay, bioMérieux, Marcy-l’Etoile, France), with HIV-1 Western  
153 Blots for final HIV infection status. We tested DBS samples for ART analytes at the Division of Clinical  
154 Pharmacology, Department of Medicine, University of Cape Town with High Performance Liquid  
155 Chromatography coupled to Tandem Mass Spectrometry. Qualitative detection of Nevirapine, Efavirenz,  
156 or Lopinavir, was carried out by a validated method using minor modifications of the method used by  
157 Koal et al.(28).

158 *Statistical analysis.* Data from each survey were originally analyzed and presented as RDS-  
159 adjusted proportions and 95% Confidence Intervals (CI) using RDS Analysis Tool v.7(4). For FSW,  
160 treatment cascade indicators were reported as RDS-adjusted proportions. For MSM, small cell sizes for  
161 ART indicators at all sites except Johannesburg returned illogical RDS-adjusted 95% CI values; thus we  
162 present here all cascades for all MSM sites as unadjusted sample proportions and 95% CIs.

163 *Population size estimation.* We calculated PSEs for each survey location for each population as  
164 the median of a plausible range of the several methods of PSE calculation described below, setting upper  
165 and lower plausibility boundaries. The several methods for each population included IBBS-derived  
166 multipliers and modified Delphi (“Wisdom of the Crowds”), and proportional estimates derived from  
167 academic literature.

168 For multipliers, we followed the “multiple multipliers” recommendations of Abdul-Qader and  
169 colleagues(27) including a unique object and event multipliers, and service multipliers where available.  
170 Point estimates were derived according to the formula  $N=n/p$  where  $N$  is the population size;  $n$  the  
171 number of objects (e.g. bracelets) distributed in the target population, or attendees at a memorable event  
172 (e.g. survey launch party), or number accessing population-specific services (e.g. HTS) over a defined  
173 time period prior to the survey; and  $p$  is the proportion of survey participants self-reporting receipt of an  
174 object, attendance at the event, or utilization of the service, respectively. Additionally, we calculated the  
175 modified Delphi indicator (“Wisdom of the Crowds”) as the mean of two responses to “How many [target  
176 population] do you think there are in and around [surveillance site city/district]?” posed at the beginning  
177 and conclusion of each survey; and the PSE for the site as the mean of the middle 90<sup>th</sup> percentile of all  
178 responses.

179 We then used literature-derived estimates to explore whether our preliminary median and  
180 plausible range results were consistent with other empirical data and expert opinion from South Africa

181 and elsewhere. We compared recommended proportions to the 2011 census-derived adult population of  
182 females (FSW) and males (MSM) aged 15-49 (the approved protocol for each survey permitted inclusion  
183 of minors at least 16 years of age; for FSW, per protocol, individuals under age 18 underwent additional  
184 screening for evidence of trafficking and were referred to appropriate social services), based on the degree  
185 of urbanicity (large metropolitan municipalities versus smaller provincial district municipalities). For  
186 FSW, this range was 0.4- 0.6% of females described by Konstant and colleagues;(29) for MSM, 1.2%-  
187 2.0% described by Caceres and colleagues.(30)

188

### 189 *Phase 2: Data extraction for preliminary cascade analysis*

190 Technical advisors used cascade indicator definitions described by the WHO cascade analysis  
191 guide and tool (2017)(26), modified for surveillance analysis by retaining PLHIV as the cascade  
192 denominator so that results would demonstrate unmet need towards UNAIDS 90-90-90 targets. Relevant  
193 treatment indicator proportions and PSEs were extracted from surveillance data and entered into a  
194 Microsoft Excel worksheet to construct three FSW and five MSM preliminary treatment cascades, using  
195 the IBBS-based median PSE and HIV prevalence estimates to define the PLHIV denominator, and the  
196 subsequent numerator for each indicator calculated as the survey-estimated proportion of PLHIV aware of  
197 status and taking ART at each site. (See Phase 3 for viral suppression indicator extrapolation).

198

### 199 *Phase 3: Stakeholder presentation and modified Delphi consensus*

200 Technical advisors (TAs) invited input on preliminary cascades following a Delphi consensus  
201 methodology described by the San Francisco (USA) Department of Public Health(31-33) (SFDPH) and  
202 previously implemented in Tanzania(34) and Ghana(35) to adopt sub-national key populations size  
203 estimates. SANAC convened three stakeholder workshops between September 2016 and February 2018  
204 facilitated by UCSF TAs, who led stakeholders in exploring the surveillance data informing the cascades.  
205 At the first face-to-face meeting, investigators explained the intended purpose of the consensus process as  
206 involving two steps: the presentation, discussion, and adoption of the surveillance cascade methods and  
207 results for each of the FSW and MSM surveillance sites; and the adoption of transparent, consistent, and  
208 methodologically sound extrapolation factors from which to construct sub-national cascades for each  
209 population in the districts for which no surveillance data existed (49 and 47, respectively). At the second  
210 face-to-face meeting, in February 2017, investigators presented preliminary extrapolation results for 11  
211 districts, including 3 of the country's 4 largest metropolitan areas with over 1.0 million total population,  
212 and 7 of 9 provincial capitals of 1.0 million or fewer residents. Stakeholders and investigators assessed  
213 the reasonableness of preliminary extrapolation results together, recommended reasonable adjustments,  
214 and adopted a final set of extrapolation assumptions and factors for sub-national PSEs and treatment  
215 cascade indicators.

216 Because neither FSW nor MSM had laboratory validated results for viral suppression available  
217 for cascades analysis, stakeholders asked TAs to consult programmatic sources of viral suppression data  
218 and recommend reasonable extrapolation assumptions. Technical advisors consulted National Health  
219 Laboratory Service viral suppression data collected between October 2015 and September 2016,  
220 disaggregated by sex and district. Under the assumption that the clinical response of FSW was as well as  
221 women generally and MSM as well as men generally on ART, and using the same urbanicity categories  
222 previously agreed upon, we calculated extrapolation factors as the mean proportion of the middle 90<sup>th</sup>  
223 percentile of virally suppressed women and men, and applied these respectively to the surveillance or  
224 extrapolated proportions of FSW and MSM on ART per district. A final meeting to achieve consensus on

225 the reasonableness of TA’s assumptions and results was convened in February 2018. TAs offered  
 226 stakeholders offered the alternative of submitting written comments in advance of the meeting.

227

228 *Phase 4: Construction of final sub-national FSW and MSM treatment cascades*

229 Technical advisors applied all consensus extrapolation factors to a pivot table pre-populated with  
 230 2011 census data disaggregated by sex and age (females 15 years and older; males 15 years and older) to  
 231 construct 52 final sub-national cascades for FSW and MSM based on definitions and indicator data  
 232 described above. Technical advisors presented a summary report on behalf of the entire group to SANAC,  
 233 NDOH, and constituent stakeholders.

234

235 **Results**

236 We constructed 8 treatment cascades (3 FSW, 5 MSM) (see Figure 1) with previously analyzed  
 237 surveillance data (see Table 1). (For convenience and ease of interpretation, we include extrapolated viral  
 238 suppression estimates in Table 1; these were a Phase 3 extrapolation outcome in our process). By  
 239 consensus, stakeholders assumed that overall population size and urbanicity might be representative of  
 240 differences in availability and uptake of health services by KP, and recommended three categories to vet  
 241 all surveillance cascade indicators against: metropolitan municipalities with total population sizes greater  
 242 than 1.0 million [A], metropolitan and district municipalities between 200,000 and 1.0 million [B], and  
 243 district municipalities less than 200,000 [C].

244 **Table 1:** South Africa Health Monitoring Survey Results: Population Size Estimates and progress  
 245 towards 90-90-90 indicator targets, 2013-14 (FSW) and 2015-16 (MSM).

246 *90-90-90 targets are expressed with PLHIV as denominator*

|                                                   | Population Size Estimates |      | Prevalence estimates/PLHIV |        | PLHIV Aware of status (Target: 90%) |       | PLHIV On ART§ (Target: 81%) |       | PLHIV Viral Suppression‡ (Target: 73%) |       |
|---------------------------------------------------|---------------------------|------|----------------------------|--------|-------------------------------------|-------|-----------------------------|-------|----------------------------------------|-------|
|                                                   | (N)                       | (%)* | %                          | (n)    | %                                   | (n)   | %                           | n     | %                                      | (n)   |
| <b>FSW (2013-14)<br/>February 2018 Consensus</b>  |                           |      |                            |        |                                     |       |                             |       |                                        |       |
| Johannesburg Metro                                | 10,895                    | 0.7% | 71.8%                      | 7,823  | 73.8%                               | 5,773 | 19.0%                       | 1,486 | 15.2%                                  | 1,189 |
| Cape Town Metro                                   | 7,500                     | 0.7% | 40.0%                      | 3,000  | 56.7%                               | 1,701 | 27.7%                       | 831   | 20.5%                                  | 615   |
| eThekweni Metro (Durban)                          | 9,323                     | 0.7% | 53.5%                      | 4,988  | 77.0%                               | 3,841 | 25.6%                       | 1,277 | 22.2%                                  | 1,107 |
| <b>MSM (2015-16)<br/>September 2016 Consensus</b> |                           |      |                            |        |                                     |       |                             |       |                                        |       |
| Johannesburg Metro                                | 37,549                    | 2.2% | 43.4%                      | 16,296 | 55.7%                               | 9,077 | 43.0%                       | 7,007 | 32.6%                                  | 5,312 |
| Cape Town Metro                                   | 29,901                    | 2.2% | 26.7%                      | 7,984  | 50.3%                               | 4,016 | 40.0%                       | 3,194 | 30.4%                                  | 2,426 |
| Capricorn DM (Polokwane)                          | 5,270                     | 1.4% | 22.3%                      | 1,175  | 24.7%                               | 290   | 22.3%                       | 262   | 15.6%                                  | 183   |
| NM Molema DM (Mahikeng)                           | 3,779                     | 1.4% | 18.2%                      | 688    | 29.4%                               | 202   | 29.4%                       | 202   | 20.6%                                  | 142   |
| Mangaung Metro (Bloemfontein)                     | 3,655                     | 1.4% | 18.1%                      | 662    | 31.8%                               | 211   | 36.4%                       | 241   | 25.5%                                  | 169   |

247

248 \*PSE % is the proportion of the adult female (for FSW) or male (for MSM) population  $\geq 15$  according to the South African  
 249 Census, 2011.  
 250 §ART for FSW are self-reported proportions by site presented in SAHMS 2013-14 report; and laboratory verified proportions by  
 251 site for MSM in SAMHMS 2015-16  
 252 ‡Viral suppression estimates are extrapolated from National Health Laboratory Services summary data, October 2016-  
 253 September 2017, disaggregated by sex and district population size; factors of 80% for FSW and 72% for MSM in metropolitan  
 254 districts >1.0 million population; and 70% for MSM in smaller metros & district municipalities adopted by stakeholder  
 255 consensus, February 2018. Proportions of PLHIV virally suppressed presented here are equivalent to the proportion of each  
 256 population's PLHIV On ART\*extrapolated proportion (e.g. 80%, 72%, etc.) assumed virally suppressed.  
 257

258

## 259 **Figure 2. FSW and MSM surveillance survey results displayed as HIV Treatment Cascades**

260 N.B. Bloemfontein (Mangaung) data anomaly due to error in data collection of self-reported awareness of status

261 Table 2 presents the summarized results of the participatory process as the adopted extrapolation  
 262 factors for all districts for which surveillance data was not available. For FSW in Johannesburg, Cape  
 263 Town, and eThekweni, stakeholders originally adopted the PSEs as presented for each of these three cities  
 264 as the September 2016 FSW Consensus PSEs. Because these results were similar to those observed by  
 265 Konstant and colleagues in 2013,(29) stakeholders recommended the adoption of extrapolation factors  
 266 recommended by Konstant to estimate FSW PSE in all other districts (i.e. 0.4%, 0.5%, and 0.6% of the  
 267 census population figure for adult females aged 15-49). In the three surveillance cities, awareness of HIV  
 268 status was high (range 56.7%-77.0%), and showed substantial drop-offs towards ART outcomes. There  
 269 was agreement among stakeholders that knowledge of HIV status was likely similar in all municipalities  
 270 regardless of size, and recommended for awareness of status proportion, the median 73.8% from  
 271 surveillance data as a valid extrapolation factor for all districts. For self-reported ART use, stakeholders  
 272 considered the age of the data (collected in 2013-14), policy shifts (from treatment eligibility of CD4<350  
 273 in 2014 to UTT in 2016), and intensified programmatic activity to recommend to TAs that self-reported  
 274 ART indicator results be multiplied by a factor of 25% for the 2018 cascades.

275 **Table 2: South African Key Populations Stakeholder Consensus Indicator Assumptions for Extrapolated**  
 276 **HIV Treatment Cascades, 2018**

| Indicator            | FSW                               |                  |                                                | MSM                                |                  |                                                |
|----------------------|-----------------------------------|------------------|------------------------------------------------|------------------------------------|------------------|------------------------------------------------|
|                      | SAHMS proportions: median (range) | Metros >1.0m (A) | Metros <1.0m (B) & District Municipalities (C) | SAMHMS proportions median (range)* | Metros >1.0m (A) | Metros <1.0m (B) & District Municipalities (C) |
| PLHIV                | 53% (40%-72%)                     | PSE*0.53         | PSE*0.53                                       | 22% (18%-43%)                      | PSE*0.30         | PSE*0.30                                       |
| Aware of HIV+ status | 74% (57%-77%)                     | PLHIV*0.738      | PLHIV*0.738                                    | 36% (23%-53%)                      | PLHIV*0.53       | PLHIV*0.27                                     |
| On ART               | 26% (19%-28%)                     | PLHIV*0.256*1.25 | PLHIV*0.256*1.25                               | 26% (15%-32%)                      | PLHIV*0.33       | PLHIV*0.17                                     |
| Virally Suppressed   | n/a                               | ART*0.80         | ART*0.752                                      | n/a                                | ART*0.72         | ART*0.702                                      |



277 \*By consensus of stakeholders, MSM Aware of status and On ART indicator extrapolations were considered as means of  
278 Category (A) and (B)&(C) municipalities' surveillance results, not as median of the given range.

279 § On ART for FSW are self-reported proportions per site presented in SAHMS 2013-14 report; On ART results for MSM are  
280 laboratory reported proportions per site in SAMHMS 2015-16

281 ‡Viral suppression results extrapolated from National Health Laboratory Services summary data, October 2016-September  
282 2017, disaggregated by sex and district population size; factors adopted by stakeholder consensus, February 2018.

283

284 At the February 2018 meeting, FSW stakeholders presented the group with systematically  
285 deduplicated programmatic data showing program reach in Johannesburg and Cape Town at 150% of the  
286 upper plausible limit from the September 2016 consensus (eThekweni reach was consistent with the  
287 September 2016 PSE). Technical advisors recommended inclusion of the programmatic data as an  
288 additional data point to calculate the median at each of the three surveillance sites and presented these  
289 results to the group with three options: reject the new estimates; adopt the new estimates for these cities  
290 only; or adopt and adjust all sub-national estimates proportionally. The stakeholders recommended  
291 adjusting PSE only for the three cities because there was no programmatic evidence from elsewhere in the  
292 country to recommend revisiting the previous consensus for these areas. The (n) for each FSW indicator  
293 in Table 1 is derived from the February 2018 FSW Consensus PSEs for these three cities; the  
294 extrapolation factors listed in Table 2 were not affected by this adjustment. We present selected  
295 extrapolated FSW cascade results for three municipalities in Figure 2.

### 296 **Figure 3. Selected Sub-National HIV Treatment Cascades for FSW and MSM (Extrapolated),** 297 **2018**

298 \*Data labels display the number of FSW estimated in each category, bar represents the proportion.

299 \*Data labels display the number of MSM estimated in each category, bar represents the proportion.

300

301 For MSM, stakeholders adopted the PSEs as presented by investigators as the September 2016  
302 MSM Consensus PSEs, and further adopted the median proportion of 2.2% as an extrapolated PSE for the  
303 largest metropolitan areas [A], and the median of 1.4% for all other areas [B and C]. For cascade  
304 indicators, MSM stakeholders agreed that a triangulated surveillance and literature-based HIV prevalence  
305 of 30% was a reasonable extrapolation assumption across all districts. Noting clustering of cascade curves  
306 by urbanicity (i.e. Johannesburg and Cape Town metros versus Mangaung metro and Capricorn and NM  
307 Molema DMs), they hypothesized a higher burden of stigma in smaller metros and DMs likely posed  
308 significant barriers to MSM linking to care; they endorsed two sets of extrapolation assumptions as the  
309 median indicator estimates of the 2 large metros [A], and the median of the three less urbanized [B and C]  
310 sites. We present selected extrapolated MSM cascade results for three municipalities (Tshwane metro  
311 with Category A assumptions; Buffalo City metro and Ehlanzeni district municipality with Category B  
312 assumptions) in Figure 3.

### 313 **Discussion**

314 Our cascades analysis of South African FSW and MSM surveillance data visually demonstrates two  
315 population-specific trends in HIV testing and treatment access. Among FSW, we observed high  
316 awareness of HIV status but a steep breakpoint to ART uptake. By comparison, among MSM, we  
317 observed less awareness of HIV status, but relatively good ART uptake among those aware of their status.  
318 These results were consistent with stakeholders' impressions from their own programmatic work, where  
319 FSW were generally receptive to testing but difficult to link to and retain in care, and MSM difficult to  
320 encourage to test but motivated to link to treatment upon diagnosis. It is important, however, not to  
321 overstate these broad comparisons into assumptions about any particular organization's reach, or the  
322 effectiveness of any particular programmatic initiative. Apart from FSW awareness of status, which  
323 approached optimal levels only in Johannesburg, all other treatment cascade indicators were well below  
324 UNAIDS 90-90-90 targets. The data suggest clear disparities between metropolitan MSM residing in  
325 relatively more tolerant social environments who have access to a wider range of public and private health  
326 services (including "specialty" community-based clinical services promoted through targeted MSM  
327 outreach); versus those living in smaller urban or rural districts characterized by higher levels of social  
328 stigma and few MSM-competent primary health clinics. And by their nature, cascades are silent about  
329 whether the "unreached" differ in salient ways from the "reached" in general, or in any particular district.  
330 Overall these cascades indicate plenty of work remains to be done for FSW and MSM. Moreover, KP  
331 needs are often distinct between and within KP groups and contexts. At sub-national levels, these  
332 comparisons allow stakeholders to visualize gaps in service provision (e.g. FSW linkage and retention;  
333 MSM regular HIV testing) to target intensive investment in programmatic activity consistent with 90-90-  
334 90 goals.

335 Additionally, while our viral load extrapolation assumption (parity with women and men in the  
336 general population) may at first glance appear not to account for the considerable number of social-  
337 structural obstacles key populations face in accessing or adhering to treatment, the triangulation of  
338 surveillance data with stakeholder programmatic data and opinion suggested otherwise. It is true that both  
339 populations face significant stigma in South African society, and sex work remains criminalized. The  
340 stakeholders critically vetted the extrapolation assumptions and the preliminary results in light of these  
341 factors, but ultimately the assumptions were consistent with their own clinical monitoring data, which  
342 they shared with the stakeholder group. This gives us further confidence in our conclusion that much of  
343 what predicts poor HIV outcomes for key populations in South Africa occur upstream in the cascade; and  
344 here is where focused and specific programmatic attention is required. FSW are lost between diagnosis  
345 and retention, MSM avoid testing and thus diagnosis; but those who do overcome population-specific  
346 obstacles may have the same chance at living healthy lives with HIV as the general population. We offer  
347 this conclusion with caution, in hope that it may be validated in the future with surveillance laboratory  
348 data (and that it will never again require extrapolation!). This said, despite this being a limitation of our  
349 cascade analysis, it demonstrates another strength of our consensus method, as laboratory data to  
350 complete the cascade will be unavailable for each population until 2019 and 2020 respectively. We would  
351 not want readers to conclude that surveillance viral load testing of KP samples is not necessary. Rather,  
352 we recommend this type of data triangulation within a consensus process as a temporary way forward,  
353 until laboratory analysis of surveillance biological samples is adequately funded and stakeholders can be  
354 confident in the validity of results.

355 The consensus process allowed us to confront common pitfalls in constructing cascades: that  
356 relevant data are frequently end products of diverse sources, methodologies, and indicator definitions (36,

357 37). In our case, investigators proceeded from best practice surveillance methodologies, and the FSW and  
358 MSM surveys tended to define cascades-relevant indicators in the same way; yet laboratory  
359 methodologies differed between the FSW and MSM IBBSs. Our consensus methodology was designed to  
360 encompass the breadth of methods and definitions and to articulate a unified, transparent, and consistent  
361 cascades methodology that proceeded from specific data sets and allowed for standardized extrapolation  
362 into data-scarce sub-national districts. Also, as demonstrated by the adjustment of FSW PSE in February  
363 2018, this participatory method enables the reconsideration of previous estimates when new data comes to  
364 light that stakeholders agree by consensus should be taken into consideration. Such consensus is critical  
365 to the development of a coordinated and coherent UTT programmatic response and assessment of  
366 progress towards 90-90-90 targets. In our case, the consensus process unfolded alongside multiple  
367 strategic planning processes including the development of the National Strategic Plan for HIV, TB and  
368 STIs (NSP) and specific Sex Worker and LGBTI HIV plans; the finalization of sub-national cascades  
369 with viral suppression estimates occurred alongside the finalization of the NSP's companion Provincial  
370 and District Implementation Plans. Stakeholders may still have opinions about the precision or accuracy  
371 of any individual estimate in any district; but they proceed from a shared understanding of what  
372 surveillance data suggests about current programmatic reach and future needs.

373 We acknowledge several limitations of this process that were explicitly vetted by our stakeholder  
374 group in arriving at the consensus estimates presented here. First, this process depends on the existence of  
375 a critical mass of stakeholders and surveillance and program data. The "KP cascades" here are explicitly  
376 FSW and MSM cascades. An opportunity to present data from 2 PWID and 2 transgender women's  
377 surveillance sites as cascades is forthcoming in 2019. This progress in KP strategic information still lags  
378 well behind need; we emphatically call for the investment of resources in PWID and transgender  
379 programming and strategic information commensurate with realizing and tracking progress towards 90-  
380 90-90 for them in South Africa and elsewhere. Moreover, these cascades are informed exclusively by  
381 surveillance data. We will be implementing a protocol in 2019 to incorporate routinely collected  
382 monitoring and evaluation data into all KP cascades using the same participatory triangulation  
383 methodology with stakeholders. We believe that this planned triangulation of surveillance and program  
384 data with stakeholders' collective experiences will result in potentially more robust estimates. Although  
385 the consensus process is transparent about the limitations of surveillance methods and data, it does not,  
386 strictly speaking, account or correct for these limitations, and may reproduce known and unknown biases.  
387 For example, in a case where PSE methods or IBBS survey recruitment may have systematically  
388 produced a point estimate biased towards an overestimate for any site (e.g. a rural district), this result will  
389 inform extrapolation assumptions and reproduce overestimates for multiple similar sub-national units. In  
390 our case among MSM, groups like university students may have been overrepresented in some  
391 surveillance samples, and cascades could be biased towards an underrepresentation of less educated MSM  
392 who lack access to resources and MSM-friendly health services (note that RDS adjustment was not  
393 consistently possible with our MSM surveillance data). Moreover, programmatic reach may be poorly  
394 aligned with surveillance survey inclusion criteria. The FSW and MSM surveillance surveys included  
395 young adults aged 16-17 years, but KP programs may lack substantial reach into adolescent sub-  
396 populations. Misalignment may ultimately be of little consequence to data interpretation and program  
397 planning, but it must be acknowledged and explicitly vetted by stakeholders. And, although the process  
398 overall affords stakeholders the opportunity to evaluate the precision of extrapolated results in any sub-

399 national unit against their own knowledge and experience, extrapolation assumptions may nonetheless be  
400 biased towards the KP data- and service-rich urban environments.

401 Finally, like any inherently political process, it is entirely possible for the group to reach  
402 conclusions that may serve the interests of just a few organizational stakeholders through systematic over-  
403 or under-estimation, which may implicitly affect perceptions of their programmatic performance.  
404 Therefore, among the most important role the technical advisors play in this process is emphasizing that a  
405 gap between empirical data, program data, and expert opinion does not mean that any stakeholder is  
406 underperforming, but that a plausible degree of uncertainty exists. This can decrease the likelihood that  
407 “consensus” does not over- or understate need or coverage related to any individual stakeholder’s  
408 performance. And we concede here that although stakeholder vetting encouraged lively debate at times  
409 from all participants, it is of course no guarantee that we arrived at the absolute truth. Nonetheless, the  
410 stakeholder group itself must be satisfied that their consensus is accurate *enough* for effective  
411 programmatic planning.

## 412 **Conclusion**

413 KP cascades could be constructed by one or two data analysts in a room by themselves on a shared  
414 workstation; we highly recommend that they not be (see Figure 4). We acknowledge that the participatory  
415 and inclusive approach co-created by stakeholders, technical analysis, and civil society is labor and  
416 resource intensive, and observe that these investments have already achieved positive impacts in wider  
417 data dissemination for program planning in South Africa. We trust it can do so elsewhere in a region  
418 where KP are frequently and deliberately excluded from both process and programs. We concede that the  
419 legal and human rights context of South Africa may be exceptionally enabling for FSW and MSM  
420 stakeholders and advocates; in some contexts similar stakeholder meetings may be prohibited by law or  
421 policy designed to prevent or suppress exactly this type of stakeholder input and empowerment. We hope  
422 this analysis aids their efforts to change this dynamic in national HIV planning.

423 **Figure 4. Recommendations for a participatory consensus process for KP cascades.**

424

425

426

427

428

## References

429

430 1. Beyrer C, Baral SD, van Griensven F, Goodreau SM, Chariyalertsak S, Wirtz AL, et al. Global  
431 epidemiology of HIV infection in men who have sex with men. *The Lancet*. 2012;380:367-77.

432 2. Mathers BM, Degenhardt L, Phillips B, Wiessing L, Hickman M, Strathdee Sa, et al. Global  
433 epidemiology of injecting drug use and HIV among people who inject drugs: a systematic review. *Lancet*.  
434 2008;372:1733-45.

435 3. Pruss-Ustun A, Wolf J, Driscoll T, Degenhardt L, Neira M, Calleja JMG. HIV due to female sex  
436 work: regional and global estimates. *PLoS ONE*. 2013;8:1-7.

437 4. Hancock M, Fellows I, Giles K. Deducer RDS-Analyst: Graphical user interface to the RDS  
438 package for respondent driven sampling. 0.1ed. 2012.

439 5. Scheibe A, Makapela D, Brown B, dos Santos M, Hariga F, Virk H, et al. HIV prevalence and  
440 risk among people who inject drugs in five South African cities. *Int J Drug Policy*. 2016;30:107-15.

441 6. SANAC. Estimating the size of the sex worker population in South Africa. 2013.

442 7. UCSF, Anova Health Institute, WRHI. South African Health Monitoring Study (SAHMS) Final  
443 Report: The Integrated Biological and Behavioural Survey among Female Sex Workers, South Africa  
444 2013-2014. 2015.

445 8. HSRC. South African National HIV Prevalence, Incidence and Behaviour Survey 2012. 2014.

446 9. McIntyre JA, Jobson G, Struthers H, De Swardt G, Rebe K. Rapid Assessment of HIV  
447 prevention, Care and Treatment Programming for MSM in South Africa, Assessment Report.  
448 Johannesburg; 2013.

449 10. UCSF. Report of the South African men-who-have-sex-with men Data Triangulation Project. San  
450 Francisco; 2015.

451 11. Petersen Z, Myers B, van Hout M-C, PIAÿddemann A, Parry C. Availability of HIV prevention  
452 and treatment services for people who inject drugs: findings from 21 countries. *Harm Reduction Journal*.  
453 2013;10(1):13.

- 454 12. SANAC, editor The South African National Sex Worker HIV Plan 2016; Pretoria.
- 455 13. SANAC. South African National LGBTI Strategic Plan 2017-2022. Pretoria; 2017.
- 456 14. UCSF. Report of the South African men-who-have-sex-with men Data Triangulation Project.  
457 San Francisco; 2015.
- 458 15. UCSF, Anova Health Institute, WRHI. South African Health Monitoring Study (SAHMS) Final  
459 Report: The Integrated Biological and Behavioural Survey among Female Sex Workers, South Africa  
460 2013-2014. 2013.
- 461 16. Scheibe A, Shelly S, Lambert A, Schneider A, Basson R, Medeiros N, et al. Using a  
462 programmatic mapping approach to plan for HIV prevention and harm reduction interventions for people  
463 who inject drugs in three South African cities. *Harm Reduction Journal*. 2017;14(1):35.
- 464 17. Scheibe A, Grasso M, Raymond HF, Manyuchi A, Osmand T, Lane T, et al. Modelling the  
465 UNAIDS 90-90-90 treatment cascade for gay, bisexual and other men who have sex with men in South  
466 Africa: using the findings of a data triangulation process to map a way forward. *AIDS and Behavior*.  
467 2017.
- 468 18. UNAIDS. 90-90-90 An ambitious treatment target to help end the AIDS epidemic Geneva 2014  
469 [Available from: [www.unaids.org/sites/default/files/media\\_asset/90-90-90\\_en\\_0.pdf](http://www.unaids.org/sites/default/files/media_asset/90-90-90_en_0.pdf)].
- 470 19. UNAIDS. 90-90-90 On the right track towards the global target Geneva 2016 [Available from:  
471 [https://reliefweb.int/sites/reliefweb.int/files/resources/90\\_90\\_90\\_Progress\\_ReportFINAL.pdf](https://reliefweb.int/sites/reliefweb.int/files/resources/90_90_90_Progress_ReportFINAL.pdf)].
- 472 20. WHO. Consolidated guidelines on the use of antiretroviral drugs for treating and preventing HIV  
473 Infection: recommendations for a public health approach - 2nd ed. Geneva; 2016.
- 474 21. Hladik W, Banech I, Bateganya M, Hakim AJ. The utility of population-based surveys to describe  
475 the continuum of HIV services for key and general populations. *International journal of STD & AIDS*.  
476 2015;0:1-8.
- 477 22. FHI360. HIV Cascade Framework for Key Populations 2015 [Available from:  
478 <http://www.fhi360.org/sites/default/files/media/documents/linkages-hiv-cascade-framework-oct15.pdf>].
- 479 23. Gupta S, Granich R. National HIV care continua for key populations. *Journal of the International  
480 Association of Providers of AIDS Care (JIAPAC)*. 2017;16:125-32.

- 481 24. Lane T, Osmand T, Marr A, Shade SB, Dunkle K, Sandfort T, et al. The Mpumalanga Men's  
482 Study (MPMS): Results of a baseline biological and behavioral hiv surveillance survey in two msm  
483 communities in south africa. PLoS ONE. 2014;9.
- 484 25. Risher K, Mayer KH, Beyrer C. HIV treatment cascade in MSM, people who inject drugs, and  
485 sex workers. Current Opinion in HIV and AIDS. 2015;10:420-9.
- 486 26. WHO. HIV test-treat-retain cascade analysis: guide and tools 2017. Cairo: World Health  
487 Organization, Regional Office for the Eastern Mediterranean; 2017.
- 488 27. Abdul-Quader AS, Baughman AL, Hladik W. Estimating the size of key populations: current  
489 status and future possibilities. Curr Opin HIV AIDS. 2014;9(2):107-14.
- 490 28. Koal T, Burhenne H, Romling R, Svoboda M, Resch K, Kaefer V. Quantification of  
491 antiretroviral drugs in dried blood spot samples by means of liquid chromatography/tandem mass  
492 spectrometry. Rapid Commun Mass Spectrom. 2005;19(21):2995-3001.
- 493 29. Konstant TL, Rangasami J, Stacey MJ, Stewart ML, Nogoduka C. Estimating the number of sex  
494 workers in South Africa: rapid population size estimation. AIDS Behav. 2015;19 Suppl 1:S3-15.
- 495 30. Caceres CF, Konda K, Segura ER, Lyster R. Epidemiology of male same-sex behaviour and  
496 associated sexual health indicators in low- and middle-income countries: 2003-2007 estimates. Sex  
497 Transm Infect. 2008;84 Suppl 1:i49-i56.
- 498 31. Raymond HF, Berekeyei S, Berglas N, Hunter J, Ojeda N, McFarland W. Estimating population  
499 size, HIV prevalence and HIV incidence among men who have sex with men: a case example of  
500 synthesising multiple empirical data sources and methods in San Francisco. Sex Transm Infect.  
501 2013;89(5):383-7.
- 502 32. Johnston LG, Prybylski D, Raymond HF, Mirzazadeh A, Manopaiboon C, McFarland W.  
503 Incorporating the service multiplier method in respondent-driven sampling surveys to estimate the size of  
504 hidden and hard-to-reach populations: case studies from around the world. Sex Transm Dis.  
505 2013;40(4):304-10.
- 506 33. Okal J, Geibel S, Muraguri N, Musyoki H, Tun W, Broz D, et al. Estimates of the size of key  
507 populations at risk for HIV infection: men who have sex with men, female sex workers and injecting drug  
508 users in Nairobi, Kenya. Sex Transm Infect. 2013;89(5):366-71.
- 509 34. Khalid FJ, Hamad FM, Othman AA, Khatib AM, Mohamed S, Ali A, et al. Estimating the  
510 number of people who inject drugs, female sex workers, and men who have sex with men, Unguja Island,  
511 Zanzibar: results and synthesis of multiple methods. AIDS Behav. 2014;18 Suppl 1:S25-31.

512 35. Quaye S, Fisher Raymond H, Atuahene K, Amenyah R, Aberle-Grasse J, McFarland W, et al.  
513 Critique and lessons learned from using multiple methods to estimate population size of men who have  
514 sex with men in Ghana. *AIDS Behav.* 2015;19 Suppl 1:S16-23.

515 36. International Advisory Panel on HIVCCO. IAPAC Guidelines for Optimizing the HIV Care  
516 Continuum for Adults and Adolescents. *Journal of the International Association of Providers of AIDS  
517 Care (JIAPAC).* 2015;14(1\_suppl):S3-S34.

518 37. Nosyk B, Montaner JSG, Colley G, Lima VD, Chan K, Heath K, et al. The cascade of HIV care  
519 in British Columbia, Canada, 1996-2011: a population-based retrospective cohort study. *Lancet Infect  
520 Dis.* 2014;14(1):40-9.

521



**Figure 1. South Africa Key Populations Treatment Cascade Indicator Definitions**

| Indicators                                    | Definition                                                                                                                                                                                            |
|-----------------------------------------------|-------------------------------------------------------------------------------------------------------------------------------------------------------------------------------------------------------|
| <b>Population Size Estimate (PSE)</b>         | Estimate of the number of KP living in a specific sub-national unit (i.e. Metro Municipality, District Municipality)                                                                                  |
| <b>[KP] Living with HIV (PLHIV)</b>           | Estimated proportion of KP who are HIV-infected, based on laboratory-reported results of biological sample testing                                                                                    |
| <b>Aware of Status (1<sup>st</sup> 90)</b>    | Estimated proportion of KPLHIV who are aware of their HIV infection, having received this result from a clinician or HIV testing services (HTS) counselor                                             |
| <b>On ART (2<sup>nd</sup> 90)</b>             | Estimated proportion of KPLHIV who are aware of their status and taking daily antiretroviral medications prescribed by a clinician, based on laboratory reported results of biological sample testing |
| <b>Virally suppressed (3<sup>rd</sup> 90)</b> | Estimated proportion of KPLHIV on ART with suppressed viral load (<400 copies), based on laboratory-reported results of biological sample testing                                                     |

bioRxiv preprint doi: <https://doi.org/10.1101/452417>; this version posted October 24, 2018. The copyright holder for this preprint (which was not certified by peer review) is the author/funder. This article is a US Government work. It is not subject to copyright under 17 USC 105 and is also made available for use under a CC0 license.

**Figure 1. South Africa Health Monitoring Survey Results: Treatment Cascade indicators for FSW and MSM**

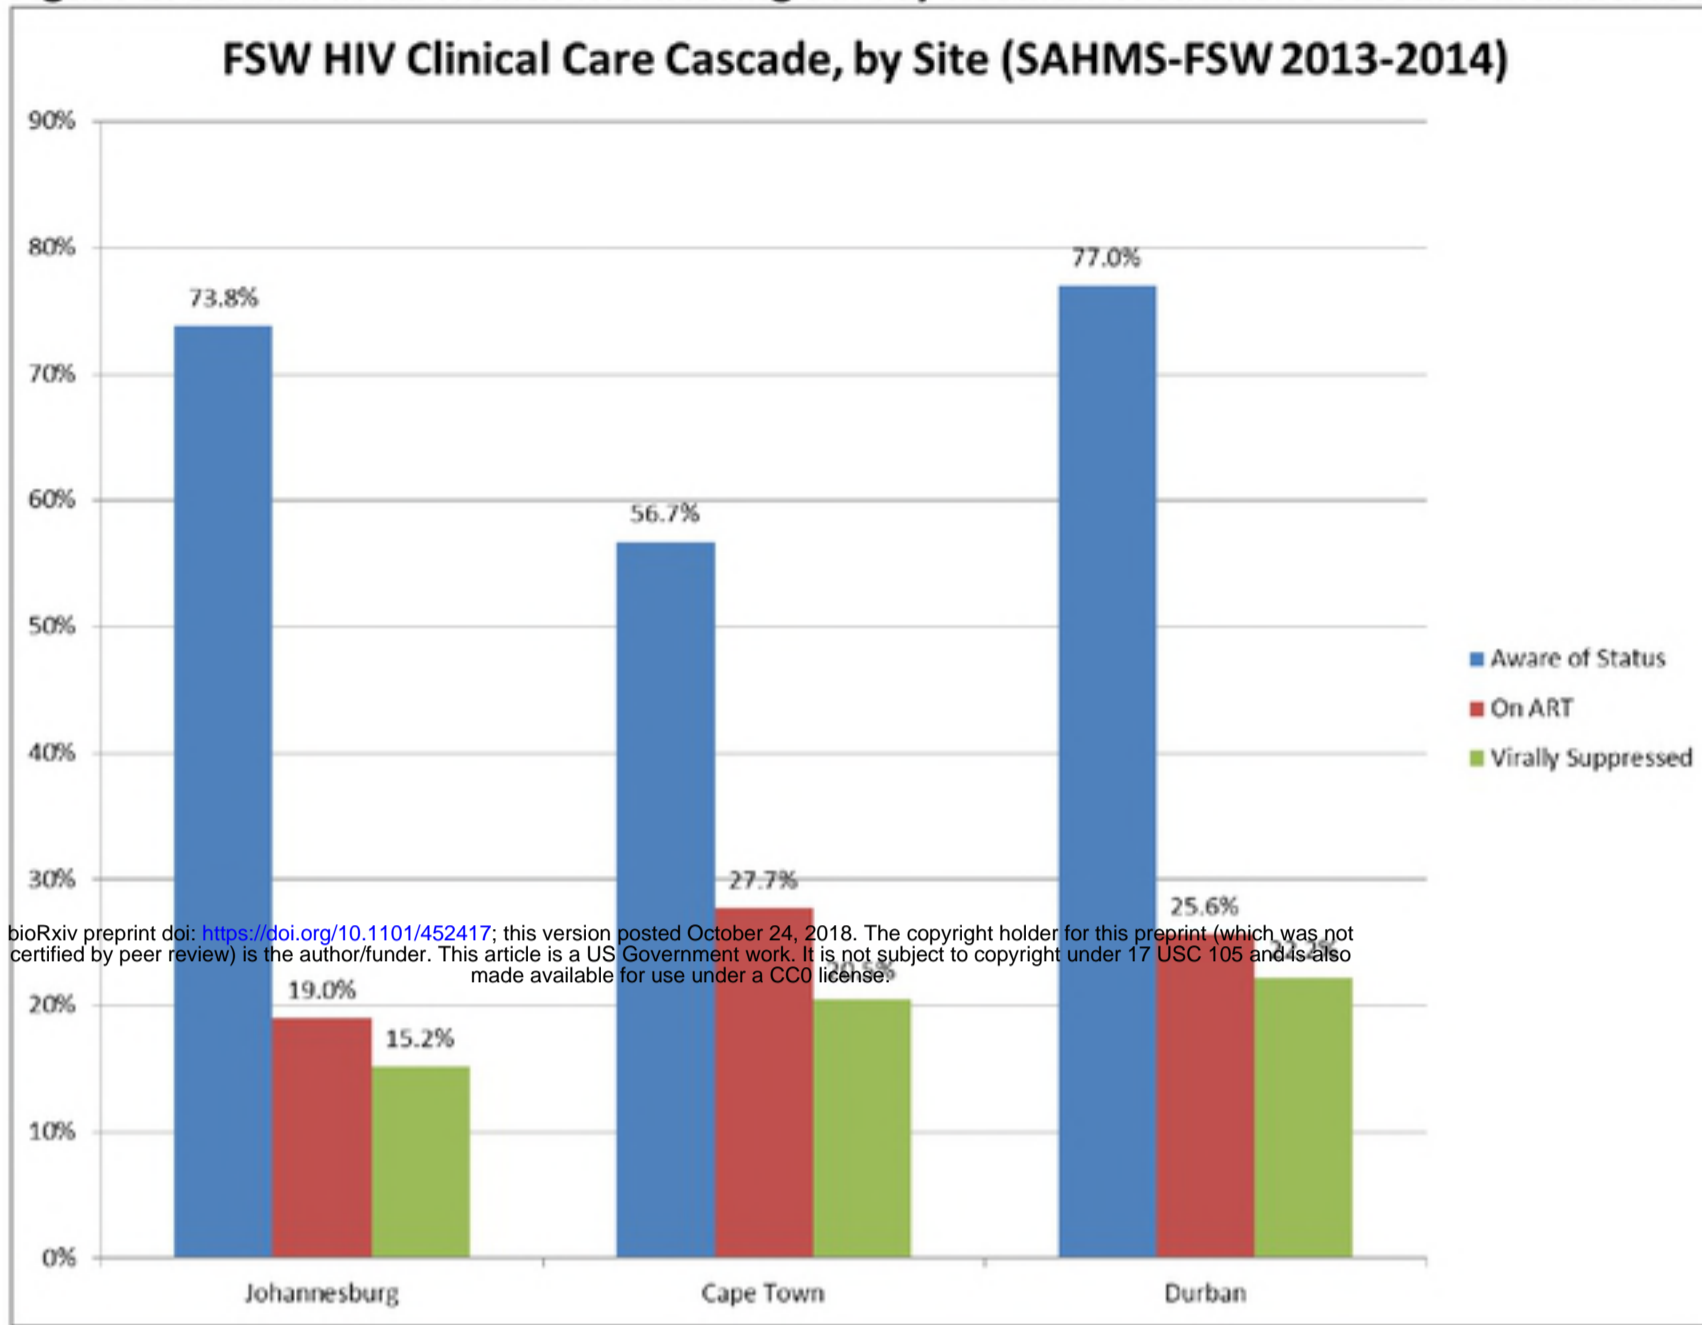

bioRxiv preprint doi: <https://doi.org/10.1101/452417>; this version posted October 24, 2018. The copyright holder for this preprint (which was not certified by peer review) is the author/funder. This article is a US Government work. It is not subject to copyright under 17 USC 105 and is also made available for use under a CC0 license.

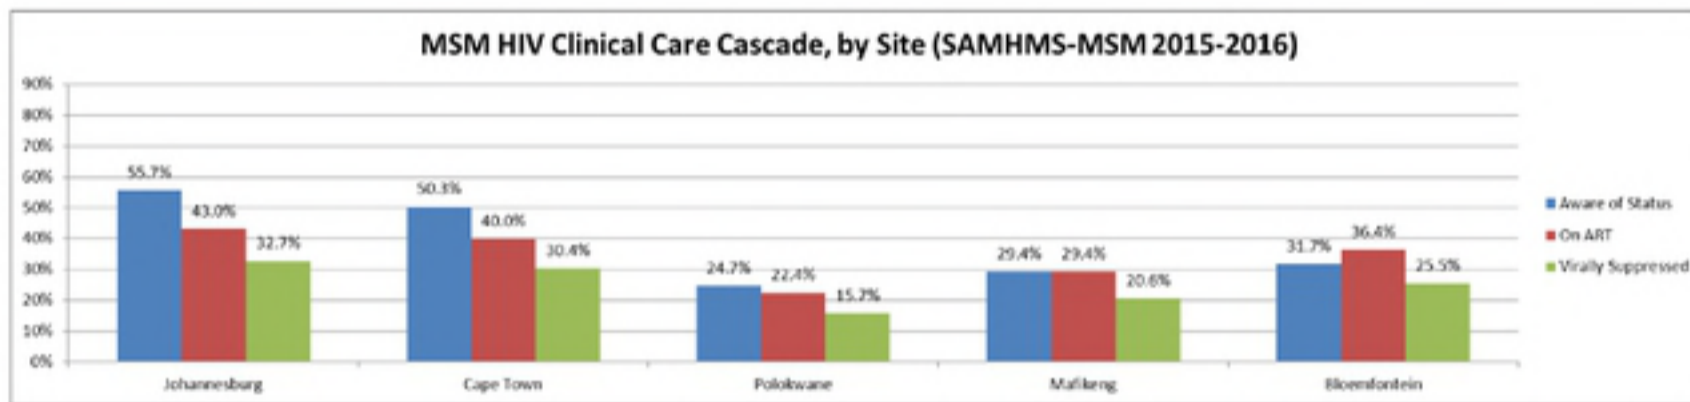

N.B. Bloemfontein (Mangaung) data anomaly due to error in data collection of self-reported awareness of status

**Figure 2. Selected Sub-National HIV Treatment Cascades for FSW and MSM (Extrapolated), 2018**

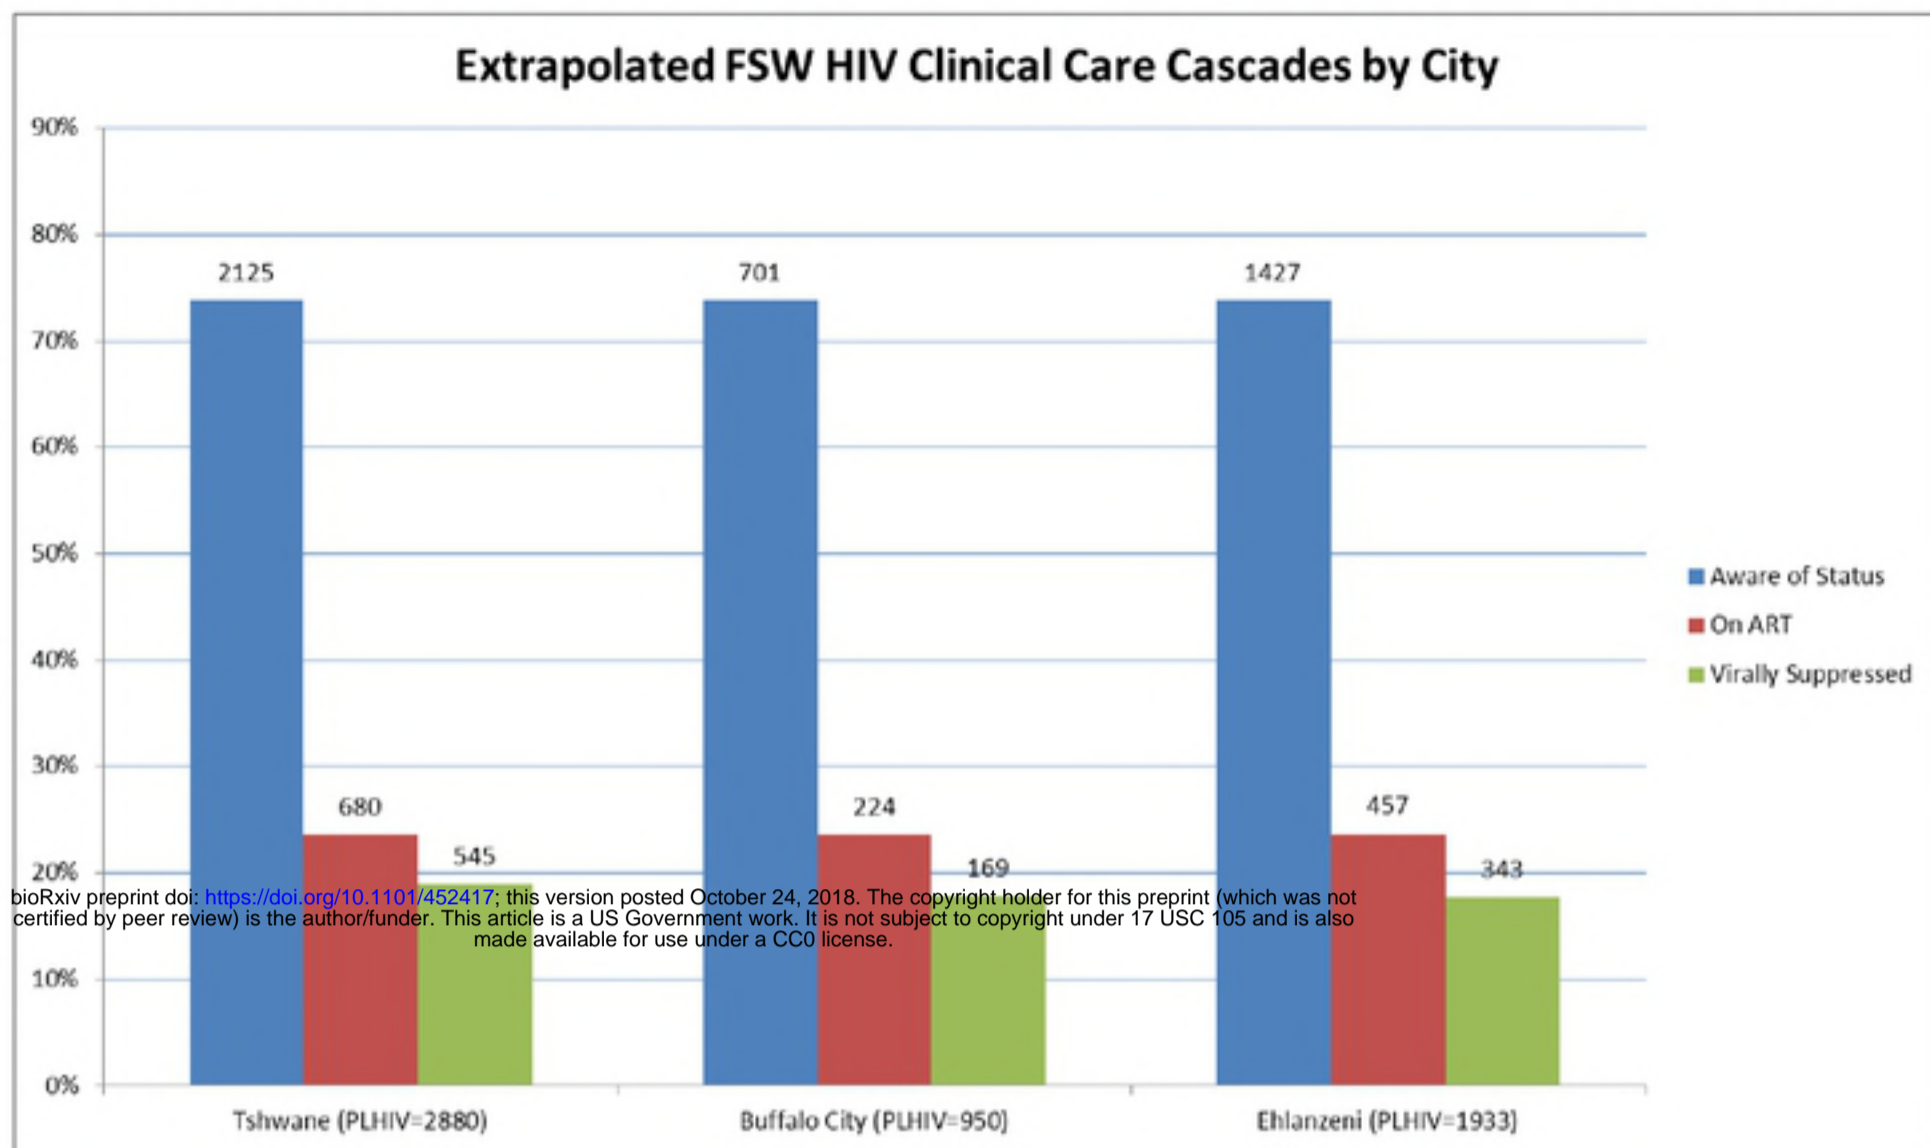

\*Data labels display the number of FSW estimated in each category, bar represents the proportion.

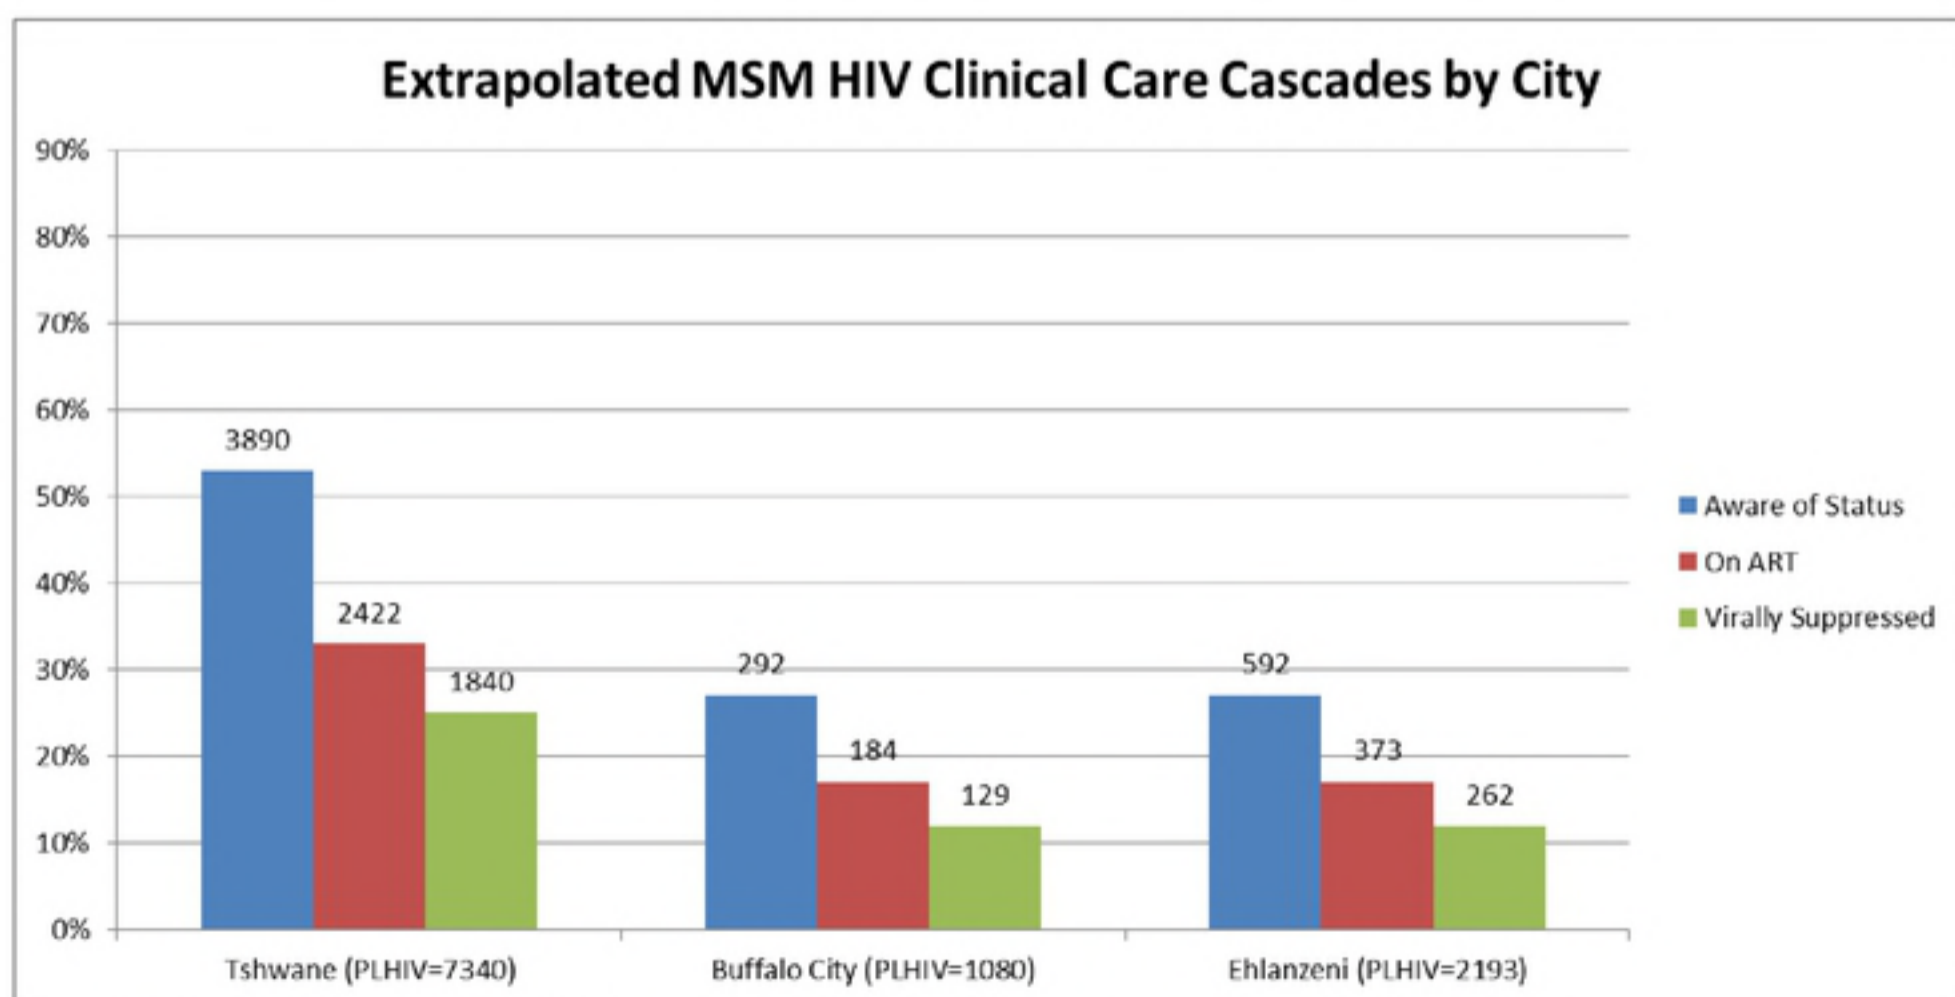

\*Data labels display the number of MSM estimated in each category, bar represents the proportion.

**A Convening Organization**, ideally from a national level, HIV-sector civil society organization, leads the process on behalf of the country. It is they who request data from stakeholders, and they who work with the technical advisors on collecting, collating, analyzing, and disseminating it to all relevant stakeholders and the general public (e.g. through a downloadable weblink).

**Stakeholders** are inclusive of any organization engaged in Key Populations programming or research as a sponsor, researcher, implementer, or advocate. The group will likely have a majority of researchers and implementers in its ranks. KP-led advocacy organizations may not have a specific HIV program area, yet are an invaluable resource in validating population size estimates. They should be part of conversations with academics and NGOs in how research and program data is interpreted and used.

**Technical Advisors** facilitate conversations among stakeholders about diverse sources of data that are considered in constructing cascades. These conversations will necessarily discuss the limitations of the data **or background studies; yet the technical advisors must ultimately lead the group to consensus on their meaning.** This would certainly include most academic public health professionals, and many M&E officers from government or non-government organizations. Equally important to their technical abilities is the ability to effectively engage data non-specialists among stakeholders in the process.

**Meetings** are as many as are needed to reach consensus on all relevant indicators for all KP. We recommend that meetings be minuted, with action items documented and resolutions about data interpretation be adopted through usual parliamentary procedures.

bioRxiv preprint doi: <https://doi.org/10.1101/2018.07.12.201118>; this version posted October 12, 2018. The copyright holder for this preprint (which was not certified by peer review) is the author/funder. This article is a US Government work. It is not subject to copyright under 17 USC 105 and is also made available for use under a CC0 license.
